# Supplementary material
Source: Springer Nature journal article supplement (https://www.springermedizin.de/resource/supplementary/12889_2012_5063_MOESM4_ESM.pdf/9494376)
Supplement: MOESM4 [file 9494376]

# Depression

## Study name

## Statistics for each study

## Std diff in means and 95% CI

|                       | Std diff<br>in means | Upper<br>limit | Lower<br>limit | Z-Value | p-Value |
|-----------------------|----------------------|----------------|----------------|---------|---------|
| Abbott 2009           | 0,11                 | 0,65           | -0,43          | 0,40    | 0,69    |
| Cheavens 2006         | 0,48                 | 1,18           | -0,23          | 1,33    | 0,18    |
| Fava 1998             | 0,67                 | 1,59           | -0,25          | 1,43    | 0,15    |
| Fava 2005             | 1,75                 | 2,95           | 0,54           | 2,83    | 0,00    |
| Gander 2012           | -0,05                | 0,20           | -0,30          | -0,38   | 0,70    |
| Grant 2009            | 0,37                 | 0,99           | -0,25          | 1,17    | 0,24    |
| Hurley 2012           | 0,41                 | 0,69           | 0,12           | 2,79    | 0,01    |
| Lichter 1980 study 2  | 0,41                 | 0,98           | -0,17          | 1,39    | 0,16    |
| Mitchell 2009         | -0,17                | 0,22           | -0,56          | -0,84   | 0,40    |
| Mongrain 2010-2012    | 0,25                 | 0,43           | 0,06           | 2,65    | 0,01    |
| Schueller 2012        | 0,11                 | 0,28           | -0,06          | 1,31    | 0,19    |
| Seligman 2005         | 0,17                 | 0,42           | -0,09          | 1,27    | 0,21    |
| Seligman 2006 study 1 | 0,47                 | 1,16           | -0,22          | 1,32    | 0,19    |
| Seligman 2006 study 2 | 1,27                 | 2,23           | 0,30           | 2,57    | 0,01    |
|                       | 0,23                 | 0,38           | 0,09           | 3,21    | 0,00    |

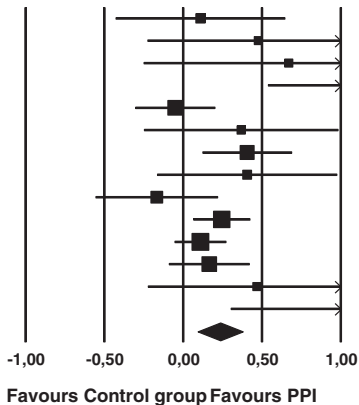

## Meta Analysis
